# Supplementary material
Source: Springer Nature journal article supplement (https://www.springermedizin.de/resource/supplementary/13044_2010_31_MOESM2_ESM.pdf/9659970)

## Cytological diagnosis (this study)

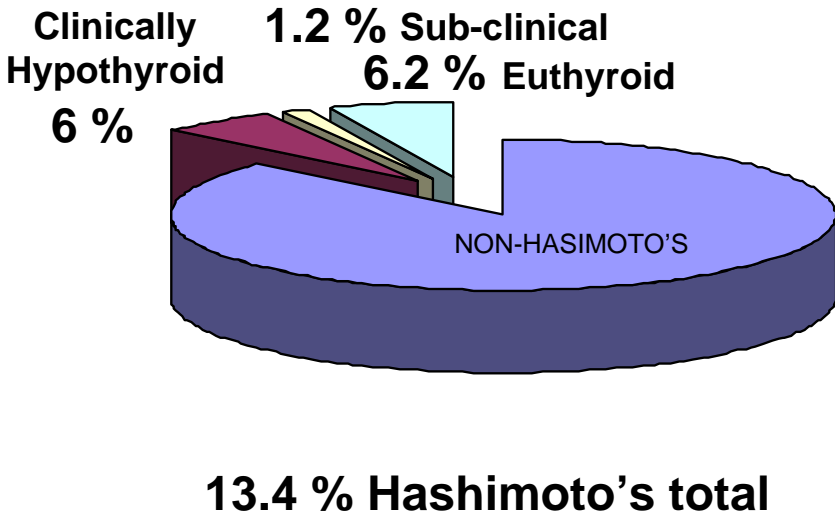

## Biochemical diagnosis (NHANESIII)

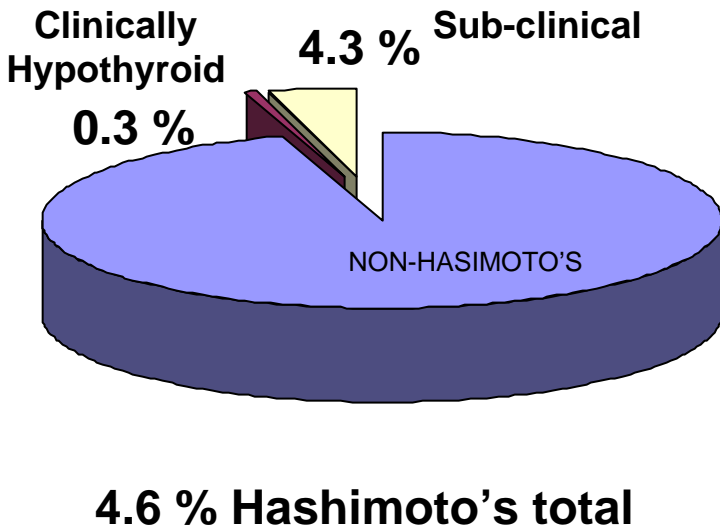

Supplement: MOESM2 [file 9659970]
